# Supplementary material
Source: PubMed Central journal article supplement (PMC6887481)
Supplement: NIHMS1060050-supplement-SUPP.pdf [file NIHMS1060050-supplement-SUPP.pdf]

# Recursive Feature Elimination by Sensitivity Testing

## I. SUPPLEMENTARY MATERIAL

### A. Generalization of Theorem 2.1

In this Section, we will prove a stronger version of Theorem 2.1, generalizing it to apply to a product distribution  $\mathcal{D}$  and to a function other than parity.

There are two parameters that are important in generalizing Theorem 2.1,  $\rho$  and  $I_{\min}$ . Under a uniform distribution, each feature  $j$  has equal probability of being either 1 or 0. Under a product distribution, one of these two probabilities may be larger than the other. We use  $\rho > 0$  to denote the maximum, over all features  $j$ , of the ratio between the larger and the smaller of these two probabilities, for product distribution  $\mathcal{D}$ . Thus, for example, if each feature  $j$  is 1 with probability  $3/4$  and 0 with probability  $1/4$ , then  $\rho = 3$ .

When the examples are labeled according to a parity function (on a subset of the variables), flipping the value of a relevant feature  $j$  in a random example drawn from  $\mathcal{D}$  always changes the value of the function. For other functions  $g$ , flipping the value of a relevant feature  $j$  in a random example drawn from  $\mathcal{D}$  will change the value of  $g$  with some non-zero probability. We denote the minimum of that probability, over all relevant  $j$ , by  $I_{\min}$ . This is the minimum *influence* of a relevant variable of  $g$ , with respect to distribution  $\mathcal{D}$  (cf. [1]).

For the uniform distribution with  $g$  being a parity function,  $\rho = 1$  and  $I_{\min} = 1$ .

The generalized theorem replaces the polynomial dependence of  $m$  on  $\frac{1}{\frac{1}{2} - \epsilon}$  in Theorem 2.1 with a polynomial dependence on  $\frac{1}{\frac{1}{2}I_{\min} - \rho\epsilon}$ .

**Theorem I.1.** *Suppose a machine learning algorithm is used to learn a classifier  $M$  for a Boolean target concept  $f$  defined on  $n$  Boolean features, where the target concept labels examples according to the value of a Boolean function  $g$ , computed on a fixed subset of the features. Suppose  $M$  has true error rate  $\epsilon < \frac{1}{2}$ , with respect to a product distribution  $\mathcal{D}$ , where  $2\rho\epsilon \leq I_{\min}$ . Then there is a quantity  $t$  that is polynomial in  $n$ ,  $\ln \frac{1}{\delta}$ , and  $\frac{1}{\frac{1}{2}I_{\min} - \rho\epsilon}$ , with the following property: for all  $0 < \delta < 1$ , if the  $\tilde{R}(j)$  values for all  $n$  features are computed using  $M$  and an i.i.d. sample of size  $t$ , drawn from distribution  $\mathcal{D}$ , then with probability least  $1 - \delta$ , the computed  $\tilde{R}(j)$  values for all the relevant features will be higher than the computed  $\tilde{R}(j)$  values for the irrelevant features.*

*Proof.* Consider a random example  $a$  drawn from  $\mathcal{D}$ . Flipping any relevant bit in  $a$  reverses the output of  $f$  with probability at least  $I_{\min}$ .

Let  $P(a)$  denote the probability of drawing assignment  $a$  from distribution  $\mathcal{D}$ . By the definition of  $\rho$ , for any bit  $j$ ,

$\frac{1}{\rho}P(a) \leq P(a_{-j}) \leq \rho P(a)$ . Here  $a_{-j}$  denotes the assignment produced by flipping bit  $j$  of  $a$ .

Let  $A$  denote the set of assignments in  $\{0, 1\}^n$  such that  $M(a) \neq f(a)$ .

Consider a relevant variable  $j$  of  $f$ . First, we will lower bound the probability, for random  $a$  drawn from distribution  $\mathcal{D}$ , that  $f(a) \neq M(a_{-j})$ . It is easy to see that  $f(a) \neq M(a_{-j})$  iff one of the following two conditions holds: (1)  $f(a) \neq f(a_{-j})$ , and  $a_{-j} \notin A$ , or (2)  $f(a) = f(a_{-j})$ , and  $a_{-j} \in A$ . Thus the probability that  $f(a) \neq M(a_{-j})$  is lower bounded by the probability that Condition (1) holds. We will now lower bound that probability.

$$\begin{aligned} & \text{Prob}[f(a) \neq f(a_{-j}) \text{ and } a_{-j} \notin A] \\ & \geq \text{Prob}[f(a) \neq f(a_{-j})] - \text{Prob}[a_{-j} \in A] \\ & \geq I_{\min} - \rho\epsilon \end{aligned} \quad (1)$$

The last inequality above uses the fact that the total probability mass of  $A$  is  $\epsilon$ , and therefore the total probability mass of assignments  $a$  such that  $a_{-j} \in A$  is at most  $\rho\epsilon$ .

Thus, for relevant variable  $j$ , for random  $a$  drawn from  $\mathcal{D}$ ,  $\text{Prob}[f(a) \neq M(a_{-j})] \geq I_{\min} - \rho\epsilon$ .

Now consider the case where  $j$  is an irrelevant variable. In this case, the only way that  $f(a) \neq M(a_{-j})$  is if  $a_{-j} \in A$ , which happens with probability at most  $\rho\epsilon$ . Therefore,  $\text{Prob}[f(a) \neq M(a_{-j})] \leq \rho\epsilon$ .

In the statement of the theorem, we assumed that  $I_{\min} > 2\rho\epsilon$ . Let  $\tau = \frac{1}{2}I_{\min} - \rho\epsilon$ .

Now suppose we compute the  $\tilde{R}(j)$  values for all features  $j$  using an i.i.d. random sample  $\mathcal{X}$  drawn from  $\mathcal{D}$  and labeled according to  $f$ . Let  $t = \frac{1}{2\tau^2} \ln \frac{n}{\delta}$  be the size of this sample. Recall that  $\tilde{R}(j)$  is the difference between the accuracy of  $M$  on  $\mathcal{X}$ , and the accuracy of  $M$  on the sample derived from  $\mathcal{X}$  by flipping  $j$  in each example. This second accuracy measures the percentage of examples  $a$  for which  $f(a) = M(a_{-j})$ . Let  $d(j)$  be the percentage of examples  $a$  for which  $f(a) \neq M(a_{-j})$ . It follows that for any pair of features  $j'$  and  $j''$ ,  $\tilde{R}(j') \geq \tilde{R}(j'')$  iff  $d(j') \geq d(j'')$ . We will prove the following claim: with probability at least  $1 - \delta$ ,  $d(j) > \frac{1}{2}I_{\min}$  for each relevant feature  $j$ , and  $d(j) < \frac{1}{2}I_{\min}$  for each irrelevant feature  $j$ . This suffices to prove the theorem.

To prove the claim, consider a random  $a$  drawn from  $\mathcal{D}$ . We can view the test of whether  $f(a) \neq M(a_{-j})$  as a Bernoulli trial, with success when the inequality holds. Thus if  $j$  is a relevant variable, the probability of success is at least  $I_{\min} - \rho\epsilon$ . If  $j$  is an irrelevant variable, the probability of success is at most  $\rho\epsilon$ .

With this view, we can apply a standard bound of Hoeffding. Consider a sequence of  $m$  independent Bernoulli trials, each

with probability  $p$  of success. Suppose that out of these  $m$  trials, the observed fraction of successes is  $\hat{p}$ . The bound of Hoeffding states that for any  $c > 0$ ,  $Prob[\hat{p} \geq p + c] \leq e^{-2mc^2}$  [2]. By exchanging the role of failures and successes, it immediately follows that the inequality  $Prob[\hat{p} \leq p - c] \leq e^{-2mc^2}$  also holds. Thus if  $m \geq \frac{1}{2c^2} \ln \frac{1}{\delta}$ , we have the following two inequalities

$$Prob[\hat{p} \geq p + t] \leq \delta \quad (2)$$

$$Prob[\hat{p} \leq p - t] \leq \delta \quad (3)$$

We apply these two inequalities to the tests performed in computing  $d(j)$  from  $\mathcal{X}$ . Consider a random assignment  $a$  drawn from  $\mathcal{D}$ . If  $j$  is relevant, then the probability of success (i.e., that  $f(a) \neq M(a_{-j})$ ) is at least  $(I_{min} - \rho\epsilon)$ . If  $j$  is irrelevant, then the probability of success is at most  $\rho\epsilon$ . The assignments in  $\mathcal{X}$  correspond to  $\frac{1}{2\tau^2} \ln \frac{n}{\delta}$  Bernoulli trials. Because  $\tau = \frac{1}{2}I_{min} - \rho\epsilon$ , applying the above bounds with  $c = \tau$  and  $s = \frac{1}{2\tau^2} \ln \frac{n}{\delta}$  implies that the following holds for each feature  $j$ : If  $j$  is relevant, then  $Prob[d(j) \leq \frac{1}{2}I_{min}] \leq \frac{\delta}{n}$ , and if  $j$  is irrelevant, then  $Prob[d(j) \geq \frac{1}{2}I_{min}] \leq \frac{\delta}{n}$ .

Since there are  $n$  features, it follows that with probability at least  $1 - \delta$ , the  $d(j)$  values for the relevant variables will all be greater than  $\frac{1}{2}I_{min}$ , and the  $d(j)$  values for the irrelevant features will be less than  $\frac{1}{2}I_{min}$ .  $\square$

The condition  $\epsilon < I_{min}/(2\rho)$  in the above theorem limits its applicability to arbitrary functions  $g$ , even under the uniform distribution. For example, consider the consensus function (which is correlation immune):  $g(x_1, \dots, x_k) = 1$  iff  $x_1 = x_2 = \dots = x_k$ . Under the uniform distribution, the value of  $I_{min}$  for the consensus function is  $1/2^{k-2}$ . For  $k = 4$ , the condition  $\epsilon < I_{min}/(2\rho)$  would then be satisfied only if the error  $\epsilon$  of model  $M$  was less than  $1/8$ .

We note that while it might be possible to prove a version of the theorem with a somewhat less restrictive condition, there are inherent limits as to what can be proved. For example, suppose  $g$  is a function on  $k$  variables that classifies at least 75% of its  $2^k$  possible examples as negative. (The consensus function on 3 variables has this property.) Then the model that predicts negative on all examples has exactly 75% accuracy. Using RFEST with such a model, there is no hope of distinguishing relevant from irrelevant variables.

## REFERENCES

- [1] L. Hellerstein and R. A. Servedio, "On pac learning algorithms for rich boolean function classes," *Theoretical Computer Science*, vol. 384, no. 1, pp. 66 – 76, 2007, theory and Applications of Models of Computation.
- [2] W. Hoeffding, "Probability inequalities for sums of bounded random variables," *Journal of the American Statistical Association*, vol. 58, no. 301, pp. 13–30, 1963.
